# Supplementary material for: Comparative Transcriptome and Phytochemical Analysis Provides Insight into Triterpene Saponin Biosynthesis in Seeds and Flowers of the Tea Plant (Camellia sinensis)
Source: MDPI journal article supplement (doi:10.3390/metabo12030204), 2022-02-24
Supplement: s1 [file s1]

**Supplementary Table S1.** Saponins detected in flowers and seeds of *C. sinensis* by UPLC-PDA-QTOF-MS.

| Organ  | Peak | Retention Time (min) | [M-H] <sup>-</sup> (m/z) | Formula                                         | Putative saponins                     | Reference |
|--------|------|----------------------|--------------------------|-------------------------------------------------|---------------------------------------|-----------|
| Flower | 1    | 25.37                | 1231                     | C <sub>59</sub> H <sub>92</sub> O <sub>27</sub> | Theasaponin A2                        | [25]      |
|        | 2    | 30.96                | 1229                     | C <sub>60</sub> H <sub>94</sub> O <sub>26</sub> | Floratheasaponin D                    |           |
|        | 3    | 32.3                 | 1215                     | C <sub>59</sub> H <sub>92</sub> O <sub>26</sub> | Chakasaponin I                        |           |
|        | 4    | 42.24                | 1171                     | C <sub>62</sub> H <sub>96</sub> O <sub>27</sub> | Floratheasaponin H                    |           |
|        | 5    | 43.05                | 1157                     |                                                 | New                                   |           |
|        | 6    | 51.31                | 1285                     | C <sub>63</sub> H <sub>98</sub> O <sub>27</sub> | Chakasaponin V/<br>Floratheasaponin E |           |
|        | 7    | 52.14                | 1271                     | C <sub>62</sub> H <sub>96</sub> O <sub>27</sub> | Chakasaponin II                       |           |
|        | 8    | 53.88                | 1285                     | C <sub>63</sub> H <sub>98</sub> O <sub>27</sub> | Chakasaponin V<br>Floratheasaponin E  |           |
|        | 9    | 54.62                | 1271                     | C <sub>62</sub> H <sub>96</sub> O <sub>27</sub> | Floratheasaponin J                    |           |
|        | 10   | 55.02                | 1285                     | C <sub>63</sub> H <sub>98</sub> O <sub>27</sub> | Chakasaponin V/<br>Floratheasaponin E |           |
|        | 11   | 55.68                | 1273                     | C <sub>62</sub> H <sub>98</sub> O <sub>27</sub> | Floratheasaponin C                    |           |
| Fruit  | 1    | 14.87                | 1187                     |                                                 | New                                   | [26]      |
|        | 2    | 16.22                | 1217                     | C <sub>58</sub> H <sub>90</sub> O <sub>27</sub> | Theasaponin E3/E6                     |           |
|        | 3    | 20.48                | 1229                     | C <sub>59</sub> H <sub>90</sub> O <sub>27</sub> | Theasaponin E1/E7                     |           |
|        | 4    | 21.62                | 1173                     | C <sub>57</sub> H <sub>90</sub> O <sub>25</sub> | Theasaponin C1                        |           |
|        | 5    | 22.74                | 1273                     | C <sub>61</sub> H <sub>94</sub> O <sub>28</sub> | Theasaponin A3                        |           |
|        | 6    | 24.91                | 1229                     | C <sub>59</sub> H <sub>90</sub> O <sub>27</sub> | Theasaponins<br>E4/E8                 |           |
|        | 7    | 25.77                | 1173                     | C <sub>57</sub> H <sub>90</sub> O <sub>25</sub> | Theasaponin B5                        |           |
|        | 8    | 26.66                | 1259                     | C <sub>60</sub> H <sub>92</sub> O <sub>28</sub> | Assamsaponin H                        |           |
|        | 9    | 28.66                | 1273                     | C <sub>61</sub> H <sub>94</sub> O <sub>28</sub> | Theasaponin E10                       |           |
|        | 10   | 29.303               | 1201                     | C <sub>58</sub> H <sub>90</sub> O <sub>26</sub> | Camelliasaponin<br>B1/B2              |           |
|        | 11   | 30.54                | 1301                     | C <sub>62</sub> H <sub>94</sub> O <sub>29</sub> | Assamsaponin F                        |           |
|        | 12   | 31.81                | 1171                     | C <sub>57</sub> H <sub>88</sub> O <sub>25</sub> | Assamsaponin A/E                      |           |
|        | 13   | 33.37                | 1271                     | C <sub>61</sub> H <sub>92</sub> O <sub>28</sub> | Assamsaponin B                        |           |
|        | 14   | 36.3                 | 1229                     | C <sub>59</sub> H <sub>90</sub> O <sub>27</sub> | Theasaponin E2                        |           |
|        | 15   | 40.65                | 1187                     | C <sub>58</sub> H <sub>92</sub> O <sub>25</sub> | Camelliasaponin<br>A1/A2              |           |
|        | 16   | 42.3                 | 1157                     |                                                 | New                                   |           |
|        | 17   | 42.7                 | 1257                     | C <sub>61</sub> H <sub>94</sub> O <sub>27</sub> | Foliatheasaponin<br>I/III             |           |
|        | 18   | 49.2                 | 1285                     | C <sub>62</sub> H <sub>94</sub> O <sub>28</sub> | Teaseedsaponin L                      |           |
|        | 19   | 50.04                | 1185                     | C <sub>58</sub> H <sub>90</sub> O <sub>25</sub> | Teaseedsaponin G                      |           |
|        | 20   | 58.22                | 1271                     | C <sub>62</sub> H <sub>96</sub> O <sub>27</sub> | Teaseedsaponin E                      |           |

**Supplementary Table S2.** Summary of the quality and output of the RNA-Seq data

| Sample | Raw_reads | Clean_reads | Clean_bases | Q20(%) | Q30(%) | GC(%) |
|--------|-----------|-------------|-------------|--------|--------|-------|
| leaf-1 | 79832696  | 79094450    | 10.42G      | 97.92  | 93.92  | 46.54 |
| leaf-2 | 62861058  | 62155632    | 8.16G       | 97.5   | 92.99  | 46.45 |
| leaf-3 | 70375808  | 69696696    | 9.17G       | 97.91  | 93.87  | 46.35 |
| TF1-1  | 46160438  | 45865230    | 6.35G       | 97.65  | 92.97  | 43.55 |
| TF1-2  | 49086870  | 48799792    | 6.77G       | 97.55  | 92.69  | 43.57 |
| TF1-3  | 40412442  | 40171884    | 5.57G       | 97.62  | 92.87  | 43.7  |
| TF2-1  | 44481480  | 44187540    | 6.13G       | 97.65  | 92.98  | 44.35 |
| TF2-2  | 42463132  | 42174196    | 5.85G       | 97.66  | 93.03  | 44.44 |
| TF2-3  | 40624918  | 40323368    | 5.59G       | 97.67  | 93     | 44.96 |
| TS1-1  | 78635468  | 77847198    | 10.37G      | 97.61  | 93.14  | 44.15 |
| TS1-2  | 70506508  | 69759976    | 9.25G       | 97.61  | 93.12  | 44.14 |
| TS1-3  | 67145340  | 66409408    | 8.79G       | 97.63  | 93.2   | 44.15 |
| TS2-1  | 66826870  | 65353714    | 8.66G       | 97.38  | 92.81  | 47    |
| TS2-2  | 61613918  | 60060960    | 7.93G       | 97.47  | 92.99  | 46.97 |
| TS2-3  | 56991284  | 55825500    | 7.45G       | 97.72  | 93.57  | 47.14 |
| TS3-1  | 42120088  | 41894586    | 5.81G       | 97.71  | 93.15  | 46.75 |
| TS3-2  | 40322838  | 40062220    | 5.55G       | 97.62  | 92.96  | 46.65 |
| TS3-3  | 42889624  | 42599718    | 5.91G       | 97.49  | 92.67  | 46.81 |

**Supplementary Table S3.** Expression pattern of genes related to MVA, MEP and LOX pathways

| Abbreviation | GenBank   | Gene ID in | Annotation                                                | Leaf  | Flower |        | Seed   |        |        |
|--------------|-----------|------------|-----------------------------------------------------------|-------|--------|--------|--------|--------|--------|
|              | accession | CSS        |                                                           | TL2   | TF1    | TF2    | TS1    | TS2    | TS3    |
| ACCA2        | MH125245  | TEA015906  | 3-Ketoacyl-CoA thiolase                                   | 9.6   | 10.56  | 33.68  | 4.06   | 2.89   | 4.58   |
| HMGS         | MH125246  | TEA014739  | 3-Hydroxy-3-methylglutaryl-CoA synthase                   | 11.79 | 116    | 58.84  | 48.32  | 164.04 | 128.18 |
| HMGR1        | MH125248  | TEA028769  | 3-Hydroxy-3-methylglutaryl coenzyme A reductase           | 16.1  | 57.47  | 112.76 | 259.44 | 506.91 | 313.56 |
| MVK          | MH125249  | TEA030674  | Mevalonate kinase                                         | 3     | 24.95  | 58.31  | 14.63  | 22.32  | 19.23  |
| PMK          | MH125250  | TEA022400  | Phosphomevalonate kinase                                  | 4.45  | 5.39   | 2.39   | 6.45   | 5      | 4.87   |
| MVD          | MH125251  | TEA026311  | Diphosphomevalonate decarboxylase                         | 16.72 | 77.9   | 37.5   | 12.62  | 94.09  | 58.46  |
| IDI          | MH125259  | TEA030524  | Isopentenyl diphosphate isomerase                         | 23.29 | 44.49  | 21.96  | 19.19  | 133.89 | 149.8  |
| FPS          | MH125267  | TEA003988  | Farnesyl diphosphate synthase                             | 49.57 | 42.5   | 19.08  | 87.4   | 110.5  | 58.95  |
| SS           | MF774226  | CSS0031155 | Squalene synthase                                         | 62.91 | 98.27  | 35.44  | 25.9   | 45.13  | 26.07  |
| DXS          | MH125252  | TEA008876  | 1-Deoxy-D-xylulose-5-phosphate synthase                   | 9.92  | 11.88  | 11.74  | 0.01   | 0.02   | 0      |
| DXR          | MH125253  | TEA005817  | 1-Deoxy-D-xylulose 5-phosphate reductoisomerase           | 12.21 | 124.11 | 42.96  | 6.16   | 5.77   | 8.81   |
| CMS          | MH125254  | TEA026482  | 2-C-Methyl-D-erythritol 4-phosphate cytidyllyltransferase | 15.7  | 17.22  | 5.18   | 8.3    | 4.53   | 6.88   |
| CMK          | MH125255  | TEA033157  | 4-Diphosphocytidyl-2-C-methyl-D-erythritol kinase         | 6.72  | 4.65   | 2.4    | 4.21   | 3.34   | 2.45   |
| MDS          | MH125256  | TEA027323  | 2-C-Methyl-d-erythritol 2,4-cyclodiphosphate synthase     | 36.78 | 33.99  | 36.43  | 8.13   | 8.41   | 14.64  |
| HDS          | MH125257  | TEA013763  | Hydroxymethylbutenyl diphosphate synthase                 | 38.71 | 49.2   | 365.02 | 17.34  | 11.59  | 14.06  |

|        |              |             |                                            |        |        |        |       |       |       |
|--------|--------------|-------------|--------------------------------------------|--------|--------|--------|-------|-------|-------|
| HDR    | MH125258     | TEA012305   | Hydroxymethylbutenyl diphosphate reductase | 98.52  | 87.37  | 92.02  | 6.05  | 5.81  | 6.23  |
| GPPS   | MH125260     | TEA022209   | Geranyl pyrophosphate synthase             | 127.91 | 11.94  | 8.72   | 23.16 | 3.78  | 2.38  |
| GGPPS3 | MH125281     | TEA018068   | Geranylgeranyl pyrophosphate synthase3     | 3.43   | 6.42   | 22.33  | 0.02  | 0.09  | 0.03  |
| GGPPS4 | MH125282     | TEA019181   | Geranylgeranyl pyrophosphate synthase4     | 44.22  | 48.67  | 24.36  | 9.24  | 38.61 | 21.43 |
| LOX1   | EU195885.2   | TEA025499   | 13-lipoxygenase 1                          | 2.68   | 4.3    | 22.15  | 0     | 0     | 0.01  |
| LOX2   | THG22978     | TEA009423   | 13-lipoxygenase 2                          | 235.84 | 0.25   | 0.86   | 0.08  | 0.15  | 0.29  |
| LOX3   | FJ794853     | Novel.15329 | 13-lipoxygenase 3                          | 19.92  | 10.61  | 46.38  | 0.2   | 0.03  | 0.5   |
| LOX4   | THG16242     | TEA011776   | 13-lipoxygenase 4                          | 83.15  | 18.14  | 42.2   | 2.34  | 0.13  | 1.39  |
| LOX5   | THG21558     | TEA020304   | 13-lipoxygenase 5                          | 8.39   | 16.04  | 10.28  | 23.74 | 19.78 | 20.08 |
| LOX6   | THG23915     | TEA020832   | 13-lipoxygenase 6                          | 0.13   | 337.77 | 739.77 | 0     | 0     | 0.01  |
| LOX7   | THG08251     | TEA012289   | 13-lipoxygenase 7                          | 27.05  | 30.67  | 24.94  | 2.92  | 3.43  | 2.23  |
| LOX11  | THG95893     | TEA027370   | 13-lipoxygenase 11                         | 0.86   | 1.57   | 0.39   | 0.15  | 0.01  | 2.28  |
| AOS2   | AHY03308.1   | TEA027984   | Allene oxide synthase 2                    | 28.83  | 49.62  | 10.89  | 5.48  | 5.73  | 0.83  |
| AOC1   | THG219730    | TEA012644   | Allene oxide cyclase 1                     | 62.56  | 96.31  | 28.2   | 95.79 | 50.62 | 62.84 |
| AOC2   | THG13397     | TEA020075   | Allene oxide cyclase 2                     | 1.65   | 6.21   | 2.71   | 2.23  | 0.96  | 1.81  |
| OPR1   | THG06104     | TEA025907   | 12-oxo-phytodienoic acid reductase 1       | 3.42   | 4.27   | 1.67   | 2.99  | 5.95  | 4.38  |
| OPR2   | THG97921     | TEA029800   | 12-oxo-phytodienoic acid reductase 2       | 18.04  | 22.82  | 12.43  | 7.42  | 6.57  | 3.67  |
| OPR3   | THG95859     | TEA027519   | 12-oxo-phytodienoic acid reductase 3       | 14.72  | 10.43  | 5.69   | 6.83  | 9.66  | 6.97  |
| OPR4   | THG95772     | TEA026804   | 12-oxo-phytodienoic acid reductase 4       | 2.21   | 4.79   | 0.94   | 0.31  | 12.43 | 0.73  |
| JMT    | QNG98966     | TEA031418   | Jasmonic acid carboxyl methyltransferase   | 14.43  | 0.94   | 1.89   | 0.02  | 0.03  | 0.02  |
| JAR    | LOC114260773 | TEA009648   | Jasmonic acid amido synthetase             | 11.59  | 3.98   | 5.41   | 10.07 | 11.18 | 14.36 |
| 13-HPL | THG13575     | TEA008699   | 13-hydroperoxide lyase                     | 160.44 | 93.03  | 51.49  | 12.08 | 5.27  | 6.76  |

\* The data indicates the mean FPKM value of the three replicates.

**Supplementary Table S4.** The standard curve of Theasaponin E1.

| Compound       | Standard curve      | Concentrations ( $\mu\text{g/mL}$ ) | R <sup>2</sup> |
|----------------|---------------------|-------------------------------------|----------------|
| Theasaponin E1 | Y=125.46 X + 689.07 | 0-1000 $\mu\text{g/mL}$             | 0.99           |

\* Y and X indicate the peak area and concentration of theasaponin E1, respectively.

**Supplementary Table S5.** Primer sequences for quantitative real-time PCR

| Gene                           | Forward primer (5'-3') | Reverse primer (5'-3') |
|--------------------------------|------------------------|------------------------|
| <i>CsJAR</i>                   | CCACAACCTCCACTCCAGAAC  | TGGCTCGTGAAGTCAACAAC   |
| <i>CsHMGR1</i>                 | CTCTTCCTCCTCCTCCTCCT   | CCTTTGTGCCCTTGGATAGT   |
| <i>CsHMGS</i>                  | ATTGGTCGGCTGGAAGTGG    | CATAGCAAGCATTGGTTGAGTC |
| <i>CsDXR</i>                   | GGCACCATGACAGGTGTTCT   | GGAAGGTGCAGTCACCAACT   |
| <i>CsSS</i>                    | CAGGAGGCAATTGAGGACAT   | GATGCCAAATCTTCAGACCC   |
| <i>CsJMT</i>                   | CGCCACAAACCACCGTAT     | CAGCCTGCCGTAGAAAGAAC   |
| <i>CsTEA027511</i>             | TTGCAAGCTCTTGTTCCAGG   | CCATCAATGCATCCAAGTCC   |
| <i>CsTEA030725</i>             | ATGAGCACCTTGCTGTGTTG   | TGGCTGTGTTTCGATGTTGCA  |
| <i>TEA016075</i>               | GGTGGTCTCTAATGGAGATC   | ATGGCGGAAAGGGCAATGAA   |
| <i>EF-1<math>\alpha</math></i> | GTGTGGAGAAGAAGGACCCA   | CGAGGCTAGTGAACAGCAAC   |

## Leaf (TL2)

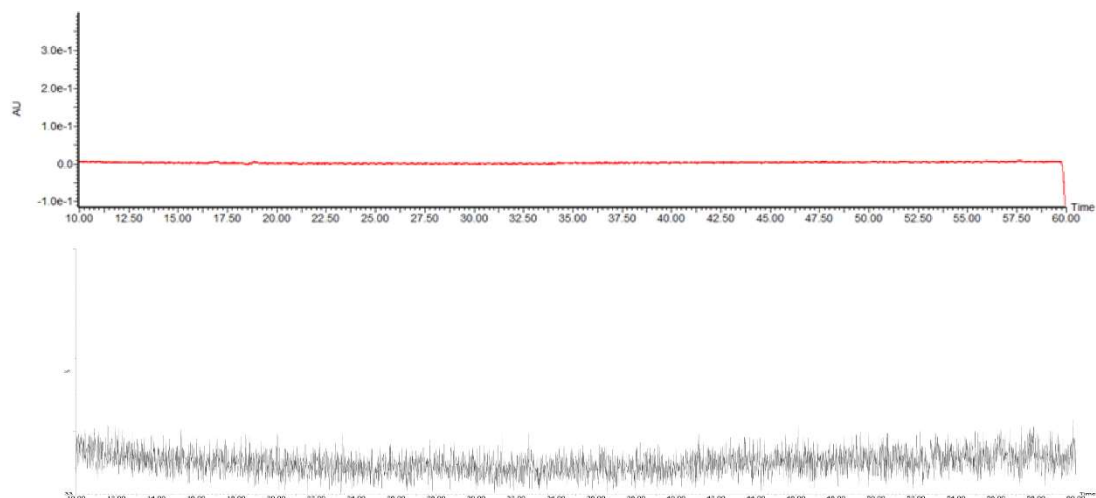

## Flower (TF1)

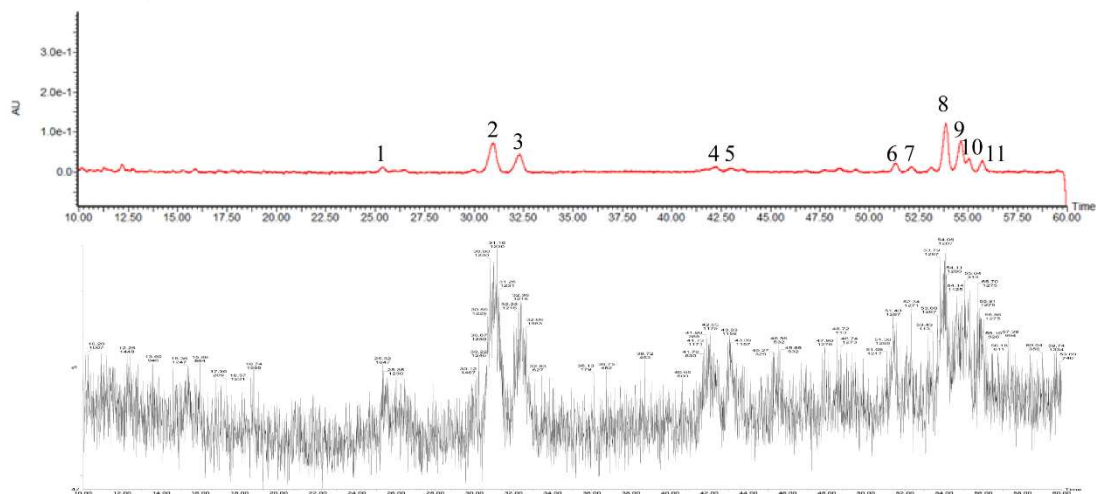

## Seed (TS2)

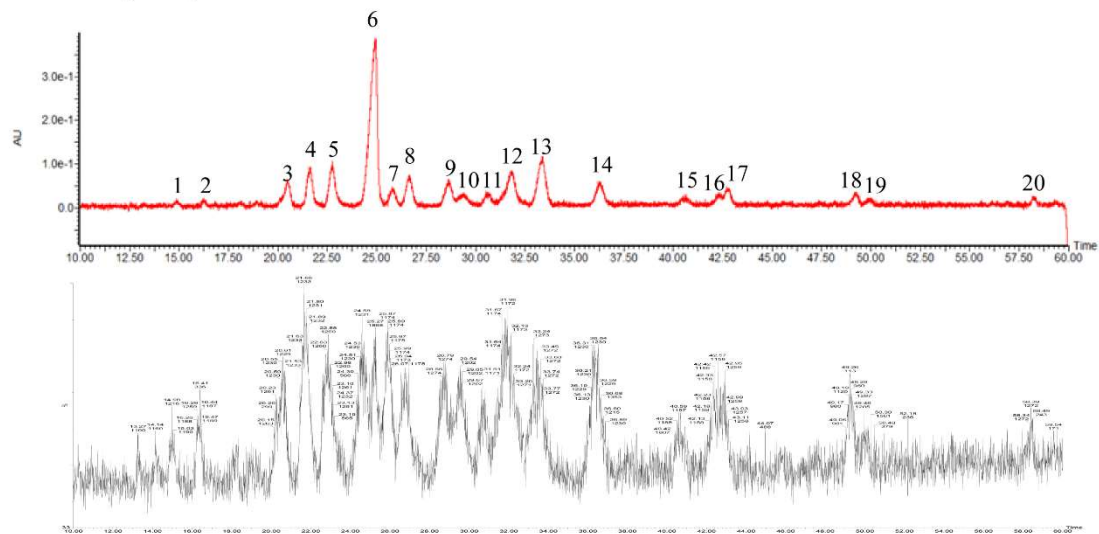

**Supplementary Figure S1.** Saponins from the leaves, flowers and seeds of *Camellia sinensis* analyzed by UPLC-PDA-QTOF-MS. The red is UPLC-PDA chromatogram at 210 nm, and the black is total ion chromatogram in negative ion mode. Each peak under PDA detector was marked by number, and the individual area of each peak was used to the quantification of saponins in tea flowers and seeds.

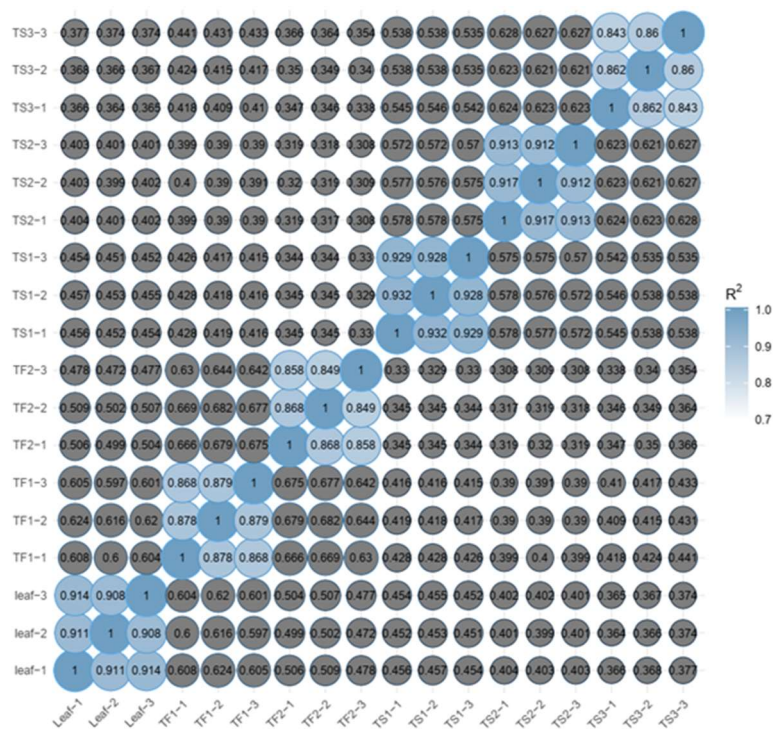

**Supplementary Figure S2.** Pearson correlation of gene expression among samples.

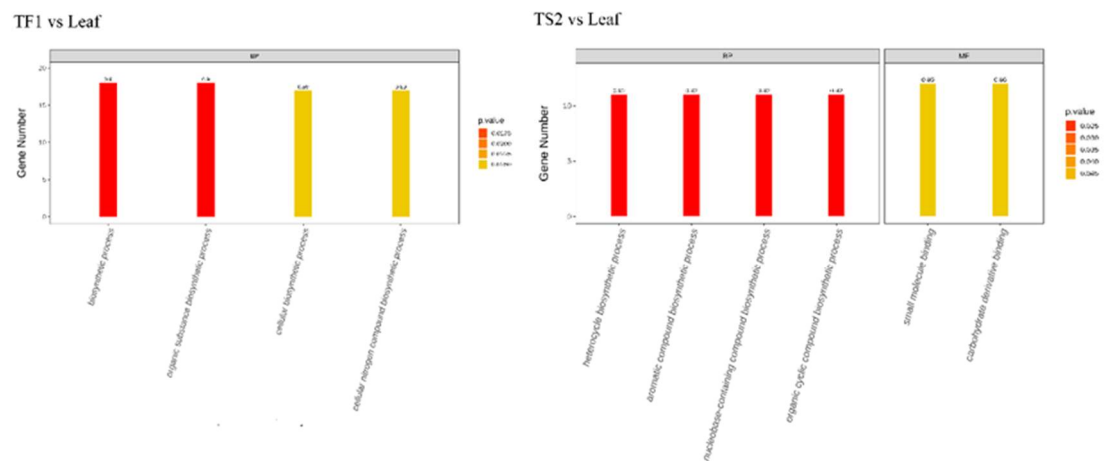

**Supplementary Figure S3.** Gene Ontology (GO) analysis of differentially expressed genes (DEGs) in two comparison groups including TF1 vs Leaf and TS2 vs Leaf.
